1 **Dihydro-alpha-lipoic acid binds to human serum albumin at Sudlow I binding site**

2 Nikola Gligorijević, Vladimir Šukalović, Goran Miljuš, Olgica Nedić, Ana Penezić\*

3 Institute for the Application of Nuclear Energy, Department for Metabolism, University of  
4 Belgrade, Banatska 31b, 11080 Belgrade

5 Institute of Chemistry, Technology and Metallurgy, University of Belgrade, Njegoševa 12,  
6 11000 Belgrade, Serbia

7

8

9 \*Corresponding author

10 Ana Penezić

11 Institute for the Application of Nuclear Energy, Department for Metabolism

12 University of Belgrade

13 Banatska 31b, 11080 Belgrade

14 E-mail: [anap@inep.co.rs](mailto:anap@inep.co.rs)

15 **ABSTRACT**

16 Binding of dihydro-alpha-lipoic acid (DHLA) to human serum albumin (HSA) was characterised  
17 in detail in this study. Binding process was monitored by spectroscopic methods and molecular  
18 docking approach. HSA binds DHLA with moderate affinity,  $0.80 \pm 0.007 \times 10^4 \text{ M}^{-1}$ .  
19 Spectroscopic data demonstrated that the preferential binding site for DHLA on HSA is IIA  
20 (Sudlow I). Hydrogen bonds and electrostatic interactions were identified as the key binding  
21 interactions. DHLA binding thermally stabilized HSA, yet it had no effect on HSA structure and  
22 its susceptibility to trypsin digestion. Molecular docking confirmed that Sudlow I site  
23 accommodated DHLA in a certain conformation in order for binding to occur. Molecular  
24 dynamic simulation showed that formed complex is stable. Reported results offer future  
25 perspectives for investigations regarding the use of DHLA as a dietary intervention but also raise  
26 concerns about the effectiveness of alpha-lipoic acid and DHLA in treatment of patients with  
27 COVID-19.

28

29 **KEYWORDS: Spectral analysis; Molecular docking; Protein-ligand interaction; Digestion;**  
30 **Protein structure**

## 31 INTRODUCTION

32 Human serum albumin (HSA) is the most dominant protein in the circulation, with a referent  
33 concentration range from 35 to 50 g/L (522  $\mu$ M to 746  $\mu$ M). This is a protein with molecular  
34 mass of 67 kDa (Wang, Tian, & Chang, 2012). Structurally, HSA is composed of three  
35 homologous domains (I, II and III), each divided into two subdomains, A and B. Dominant  
36 secondary structure motif of HSA is  $\alpha$ -helix (McLachlan & Walker, 1977).

37 HSA has many important functions in the circulation. Due to its high concentration, HSA  
38 participates in the osmotic pressure regulation (Lee & Wu, 2015). Its free Cys34 thiol group (in  
39 healthy individuals 70–80% of Cys34 thiol group is in a reduced form), makes HSA an important  
40 factor for plasma antioxidant capacity, contributing by 80% to the total plasma thiol amount  
41 (Pavićević et al., 2014). HSA is also a general transporter of fatty acids, ions and drugs. Due to  
42 its structure, HSA is able to accommodate and bind a variety of small molecules with moderate  
43 to high affinities. Two main binding sites for a plethora of different molecules (excluding fatty  
44 acids) are located at IIA subdomain or Sudlow I binding site, and IIIA subdomain or Sudlow II  
45 binding site. Drugs warfarin and ibuprofen are stereotypical ligands for Sudlow site I and  
46 Sudlow site II, respectively (Fasano et al., 2005).

47 Lipoic acid (LA) is a naturally occurring molecule whose main sources are potato, broccoli and  
48 spinach. Humans can also synthesize LA in small amounts. LA is readily absorbed from foods  
49 and its oral administration as a drug is a viable therapeutic option, including the treatment of  
50 patients with COVID-19 infection (Horowitz & Freeman, 2020; Zhang & Liu, 2020). LA  
51 supplements are also commercially available, with LA concentrations up to 600 mg per tablet.  
52 LA is shown to improve glycemic control, alleviate symptoms of diabetic polyneuropathy and is  
53 also effective against toxicity caused by heavy metal poisoning. Antioxidant activity of LA is  
54 manifested through ROS scavenging, transition metal ions (e.g., iron and copper) chelating,  
55 cytosolic glutathione and vitamin C levels increase, and oxidative stress damage repair (Zuliani  
56 & Baroni, 2015).

57 Following cellular uptake, LA is reduced to dihydrolipoic acid (DHLA), which is a very potent  
58 reducing agent (Zuliani & Baroni, 2015). LA has several beneficial effects such as antioxidant,  
59 improvement of glycemic control, mitigation of toxicity by heavy metal poisoning and  
60 immunomodulatory effects (Salinthoné, Yadav, Bourdette, & Carr, 2008; Smith, Shenvi,  
61 Widlansky, Suh, & Hagen, 2004; Zuliani & Baroni, 2015).

62 Although the ability of albumin to bind DHLA is well known (Kawabata & Packer, 1994), no  
63 detailed analysis of this interaction has been reported so far. In the case of bovine albumin  
64 (BSA), DHLA was shown to bind at IIIA site (Suji et al., 2008), however no binding  
65 experiments in the presence of the specific ligand for this site were performed. Taking into  
66 account structural similarity of DHLA and octanoic fatty acid, it was proposed that DHLA binds

67 to IIA site (Atukeren, Aydin, Uslu, Gumustas, & Cakatay, 2010), however, IIIA site was also  
68 considered (Suji et al., 2008).

69 Having in mind that DHLA is a very potent antioxidant and its use can alleviate a number of  
70 conditions related to oxidative stress, it seemed relevant to elucidate its mode of interaction with  
71 HSA, a universal transporter in the circulation. The properties of this interaction, are still  
72 unknown and undefined, so the present study aimed to investigate characteristics of the DHLA-  
73 HSA binding in detail, by using spectroscopic and molecular docking approach.

## 74 **MATERIALS AND METHODS**

### 75 *Materials*

76 All chemicals used were of analytical grade and were purchased from Sigma (Burlington,  
77 Massachusetts, USA). Stock solution of HSA, purchased from Sigma (A-1653) and used without  
78 additional purification, was made by dissolving HSA in 10 mM PBS, pH 7.4. The concentration  
79 of HSA was determined by using bicinchoninic acid (BCA) assay kit (Thermo Fisher Scientific,  
80 Waltham, Massachusetts, USA). Stock solution (5 mM) of DHLA was prepared by suspending  
81 DHLA in 10 mM PBS and then adding a small volume of 1 M NaOH until full clarification of  
82 solution was reached (Perricone et al., 1999). Trypsin was purchased from the Institute Torlak  
83 (Belgrade, Serbia) as a 0.25 % solution. All experiments were performed in triplicate at room  
84 temperature, using 10 mM PBS, pH 7.4, unless otherwise stated.

### 85 *Spectrofluorometric analysis of HSA-DHLA complex formation*

86 Binding constant ( $K_a$ ) of HSA-DHLA complex was determined by recording the quenching of  
87 intrinsic fluorescence emission of HSA (0.4  $\mu\text{M}$ ) in the presence of increasing concentrations of  
88 DHLA (from 4 to 35  $\mu\text{M}$ ) at 37 °C. Fluorescence spectra were recorded using FluoroMax®-4  
89 spectrofluorometer (Horiba Scientific, Japan). HSA was excited at 280 nm and emission spectra  
90 were recorded in the range from 290 to 450 nm. Each spectrum was corrected for the emission of  
91 the control that contained only DHLA at particular concentration. The change of the emission  
92 intensity at 338 nm (HSA emission maximum) was used for the calculation of the binding  
93 constant. Emission intensity measured for HSA was first corrected for the small inner filter effect  
94 of DHLA using the equation:

$$95 \quad F_c = F_0 \times 10^{(A_{ex}+A_{em})/2}$$

96 where  $F_c$  is corrected fluorescence,  $F_0$  is measured fluorescence,  $A_{ex}$  and  $A_{em}$  are absorbances  
97 at excitation and emission wavelengths which are 290 nm and 338 nm, respectively.

98 Using corrected fluorescence, binding constant between HSA and DHLA was calculated using  
99 the following equation:

$$\log \frac{F_0 - F}{F} = -n \log \frac{1}{[L] - [P] \frac{F_0 - F}{F_0}} + n \log K_a$$

100

101 where  $F_0$  and  $F$  represent intensities of emission signals of HSA in the absence and in the  
102 presence of DHLA,  $[L]$  represents the total concentration of ligand (DHLA) and  $[P]$  the total  
103 concentration of protein (HSA).

104 Type of quenching, whether it's static (complex formation) or dynamic, was determined by  
105 plotting Stern-Volmer (SV) graph and calculating SV quenching constant ( $K_{sv}$ ) from it by  
106 applying the following equation:

$$\frac{F_0}{F} = 1 + k_q \tau_0 [Q] = 1 + K_{SV} [Q]$$

107

108 where  $F_0$  and  $F$  are intensities of emission signals without and in the presence of DHLA,  $k_q$   
109 represents the biomolecule quenching rate constant,  $\tau_0$  is the average lifetime of the biomolecule  
110 without quencher ( $10^{-8}$  s),  $[Q]$  is the total concentration of quencher (DHLA). The slope from SV  
111 plot represents  $K_{SV}$ .  $K_{SV}$  was further used for the calculation of  $k_q$ .

112 Thermodynamic parameters of DHLA binding to HSA were calculated by using the same  
113 experimental approach as for  $K_a$  calculation but at three different temperatures, 25, 30 and 37  
114 °C. Calculated binding constants at three temperatures were then used to plot Van't Hoff graph.  
115 Enthalpy ( $\Delta H$ ) and entropy ( $\Delta S$ ) were calculated from that graph applying the following  
116 equation:

$$\ln K_a = -\frac{\Delta H}{RT} + \frac{\Delta S}{R}$$

117

118 where  $T$  is temperature in Kelvins (K) and  $R$  is a universal gas constant ( $8.314 \text{ J mol}^{-1} \text{ K}^{-1}$ ).  $\Delta H$   
119 was calculated from the slope of Van't Hoff graph and  $\Delta S$  from the intercept. The change in  
120 Gibbs free energy was calculated from the equation:

$$\Delta G = \Delta H - T\Delta S$$

121

122 For specific fluorescence emission changes of 18 Tyr residues or the only Trp214 residue,  
123 synchronous fluorescence spectra were recorded on RF-6000 spectrophotometer (Shimadzu,  
124 Japan). Spectra were recorded in the range from 280 to 330 nm with  $\Delta\lambda$  of 60 nm for Trp214 and  
125 in the range from 290 to 325 nm with  $\Delta\lambda$  of 15 nm for Tyr residues. Here,  $\Delta\lambda$  represents  $\Delta\lambda$  of  
126 emission –  $\Delta\lambda$  of excitation for each specific residue.

127 For the confirmation of the specific binding site for DHLA on HSA, site IIA (Sudlow I) on HSA  
128 ( $0.4 \mu\text{M}$ ) was blocked using site-specific ligand warfarin ( $40 \mu\text{M}$ ). DHLA ( $20$  and  $40 \mu\text{M}$ ) was

129 added to this mixture and specific fluorescence emission of wafarin ( $\lambda_{ex} = 310$  nm) was  
130 recorded in the range from 340 to 440 nm (Vasquez, Vu, Schultz, & Vullev, 2009).

### 131 *Circular dichroism (CD) spectropolarimetric analysis of HSA-DHLA complex*

132 The influence of DHLA binding on HSA structure was determined by CD-spectropolarimeter J-  
133 815 (Jasco, Japan) at room temperature and scan speed of 50 nm/min. Different concentrations of  
134 DHLA were added (6, 15 and 30  $\mu$ M) to HSA (3  $\mu$ M). Both HSA and DHLA stock solutions  
135 were dissolved in 10 mM phosphate buffer, pH 7.4. Tertiary protein structure was analyzed by  
136 recording near-UV CD spectra in the range from 260 to 320 nm using a cell path of 10 mm,  
137 while secondary protein structure was monitored by recording a far-UV CD spectra in the range  
138 from 185-260 nm using a cell path of 0.5 mm. Spectra obtained for mixtures were corrected for  
139 spectra derived from DHLA alone.

### 140 *UV-VIS analysis of HSA-DHLA complex*

141 UV-VIS spectra of HSA (9  $\mu$ M) in the presence of DHLA at different concentrations (9, 45 and  
142 90  $\mu$ M) were recorded at room temperature using Ultrospec 2000 spectrophotometer (Pharmacia  
143 Biotech, Sweden) in the range from 250 to 300 nm. A spectrum of each mixture was corrected  
144 for a spectrum obtained for DHLA alone. Also, UV-VIS spectrum of DHLA (90  $\mu$ M) in the  
145 presence of HSA (9  $\mu$ M) was recorded in the range from 300 to 450 nm and corrected for a  
146 spectrum obtained for HSA alone.

### 147 *Temperature stability analysis of HSA-DHLA complex*

148 Temperature stability of HSA (0.4  $\mu$ M) alone and in the presence of DHLA (40  $\mu$ M) was  
149 determined by recording the reduction of fluorescence emission at 338 nm (emission peak of  
150 HSA) and at 335 nm (emission peak of HSA-DHLA complex), using the same equipment as in  
151 the titration experiment. Emission was recorded in the temperature range from 37 to 87 °C with a  
152 temperature increase rate of 2 °C. A mixture was allowed to equilibrate for 1 min before the  
153 measurement at each temperature. The obtained spectra were corrected by subtracting spectra of  
154 DHLA alone at each temperature. Results were fitted to sigmoid curves where inflection points  
155 represent melting temperatures ( $T_m$ ).

### 156 *Proteolytic analysis using trypsin*

157 For the investigation if DHLA binding affects susceptibility of HSA to trypsin proteolysis, the  
158 following experiment was performed at 37 °C. To solutions containing 4  $\mu$ M HSA, alone and in  
159 the presence of DHLA (40  $\mu$ M), 25  $\mu$ L of 0.25 % trypsin solution was added. The final volume  
160 of reaction mixtures was 1 mL. At certain time points (1, 5, 10, 20 and 30 min) 50  $\mu$ L aliquots  
161 were taken from the reaction mixture and PMSF immediately added at the final concentration of  
162 2 mM, thus stopping the reaction. Proteolytic fragments of HSA were analyzed by reducing

163 SDS-PAGE using a 12 % gel in a standard manner. Gel was stained using Silver Stain Plus Kit  
164 (Bio-Rad, Hercules, California, USA).

#### 165 *Docking simulations*

166 Docking simulations were carried out with Schrodinger Maestro Suite (Schrödinger, LLC, New  
167 York, NY, 2018) using crystal structure of HSA complexed with warfarin (PDB code: 2BXD,  
168 (Ghuman et al., 2005), obtained from RCSB PDB database (<https://www.rcsb.org/>). DHLA  
169 structure was drawn in ChemDraw program (PerkinElmer Informatics, 2017). All structures  
170 were prepared in Maestro software, using default procedures. Up to 20 different docked  
171 structures were generated with Induced fit docking protocol (Sherman, Day, Jacobson, Friesner,  
172 & Farid, 2006). The obtained docking structures were examined and the best structure was  
173 selected based on the number of receptor-ligand interactions and docking score.

#### 174 *Molecular dynamics (MD) simulations*

175 MD simulations were done in Schrodinger Desmond software package (Bowers et al., 2006).  
176 Selected docked structure for MD was solvated with TIP3P explicit water model, and neutralized  
177 via counter ions. Salt solution of 0.15 M KCl was added. To calculate the interactions between  
178 all atoms OPLS 2003 force field was used. For the calculation of the long-range Coulombic  
179 interactions, particle-mesh Ewald (PME) method was used, with the cut-off radius of 9 Å for the  
180 short-range Van der Waals (VdW) and electrostatic interactions.

181 During the course of the simulation, constant temperature of 310 K and a pressure of 1.01235 bar  
182 were maintained, using the Nose–Hoover thermostat, and the Martyna Tobias Klein method. 50  
183 ns MD simulation with 2.0 fs step was performed and the collected trajectory used in the MD  
184 analysis to asses docking pose and the stability of protein-ligand interactions.

## 185 **RESULTS AND DISSCUSION**

### 186 *Binding of DHLA by HSA*

187 The presence of DHLA quenches intrinsic fluorescence of HSA, as can be seen from Figure 1A.  
188 Moreover, a very small blue shift of 3 nm is observed at the emission maximum of HSA, as the  
189 concentration of DHLA increases. These results suggest that HSA binds DHLA and that polarity  
190 of the surrounding of Tyr and Trp214 amino acid residues is not significantly altered.  
191 Fluorescence quenching can be both dynamic and static (complex formation). In order to  
192 determine which type is present here, SV graph was plotted (Figure 1B) and from its slope Ksv  
193 was calculated. The obtained SV plot is linear ( $r^2 = 0.99$ ), indicating that only one type of  
194 quenching occurs in the observed system. Ksv was calculated to be  $0.83 \times 10^4 \text{ M}^{-1}$  and the  
195 quenching rate constant of the biomolecule,  $k_q$ , was calculated to be  $0.83 \times 10^{12} \text{ M}^{-1}$ . Since  $k_q$  is  
196 about two orders of magnitude higher than the diffusion rate of biomolecules ( $10^{10} \text{ M}^{-1}\text{s}^{-1}$ ), this  
197 result strongly suggests the presence of static type of quenching, confirming that HSA binds

198 DHLA. From the equation (2) and the plot from Figure 1C,  $K_a$  at 37 °C was calculated to be  
199  $0.80 \pm 0.007 \times 10^4 \text{ M}^{-1}$ , showing that HSA binds DHLA with moderate affinity.

200 When  $K_a$  was calculated at three different temperatures, its value decreased as the temperature  
201 increased. This usually occurs, but is not exclusive, in static type of fluorescence quenching  
202 (excluding entropy driven binding) since complex formation is weaker at higher temperatures  
203 (Van De Weert & Stella, 2011). Using the obtained  $K_a$  values at three temperatures,  
204 thermodynamic parameters were calculated from Van't Hoff plot (Figure 1D). Large negative  
205 value of  $\Delta H$  was obtained,  $-32 \text{ kJmol}^{-1}$  as well as small negative value of  $\Delta S$ ,  $29 \text{ Jmol}^{-1}\text{K}^{-1}$ . These  
206 results indicate that electrostatic interactions, hydrogen bonds and Van der Waals interactions are  
207 mainly responsible for complex formation between HSA and DHLA. The change in Gibbs free  
208 energy,  $\Delta G$ , at 37 °C was calculated to be  $-23 \text{ kJmol}^{-1}$ .

209 Synchronous fluorescence spectra can give information about changes in the emission of Tyr and  
210 Trp amino acid residues. Since HSA has only one Trp residue, located inside the binding site IIA  
211 (Sudlow I) (Salem, Lotfy, Amin, & Ghattas, 2019), information from synchronous spectra  
212 provides insight into the binding place for certain ligand. In the presence of increasing  
213 concentrations of DHLA, Trp specific emission spectrum was significantly quenched (Figure  
214 2A), while that originating from Tyr was reduced to a very small extent (Figure 2B). Considering  
215 the position of the Trp residue in HSA, this result strongly indicated that the binding site for  
216 DHLA is located in IIA subdomain (Sudlow I). To confirm this, DHLA was added to HSA in the  
217 presence of warfarin, and the change in warfarin fluorescence was recorded. When bound to  
218 HSA, warfarin fluorescence intensity increases at its emission maximum (Figure 2C). This is a  
219 usual consequence of ligand binding to a protein, since the ligand becomes shielded from water  
220 and located in a more hydrophobic environment (Liang, Tajmir-Riahi, & Subirade, 2008).  
221 Similar observation was recorded in the case of phycocyanobilin (PCB) binding to HSA that  
222 occurs at both IIA and IB subdomains of HSA (Minic et al., 2015). Binding of warfarin to HSA  
223 is well characterized with the affinity constant of about  $10^5 \text{ M}^{-1}$  (Li et al., 2014). As warfarin  
224 specifically binds to Sudlow I site on HSA, it is used to block this site in the studies aimed to  
225 locate the exact binding site for other ligands (Petitpas, Bhattacharya, Twine, East, & Curry,  
226 2001). Results shown in Figure 2C indicate that the emission spectrum of warfarin remains the  
227 same in the presence of DHLA (at two concentrations), confirming that binding site IIA on HSA  
228 remains occupied by warfarin, thus suggesting that this site is the preferential binding site for  
229 DHLA. Even in equimolar concentrations of DHLA and warfarin, fluorescence spectrum of  
230 warfarin remains unaltered, indicating that HSA binding affinity for DHLA is lower than for  
231 warfarin, which is in agreement with the calculated  $K_a$  for HSA-DHLA complex. Having this in  
232 mind, it is noteworthy to mention a current pandemic situation with COVID-19 and its potential  
233 treatment with alpha lipoic acid (Horowitz & Freeman, 2020; Zhang & Liu, 2020). It was  
234 proposed that LA blocks NF- $\kappa$ B and cytokine formation, and thus alleviates cytokine storm  
235 syndrome in critically ill patients (Horowitz & Freeman, 2020). Since warfarin and its

236 derivatives are commonly used as anticoagulants (also included in the therapy of severe cases  
237 with COVID-19) which preferentially bind to Sudlow I site on HSA, it is questionable whether  
238 LA treatment of patients infected with virus Sars-CoV-2 is sufficiently beneficial if they also  
239 receive warfarin.

240 Proteins absorb light in the UV region at about 280 nm due to the presence of aromatic amino  
241 acid residues and changes in the absorption spectrum of a protein in this region may occur as a  
242 consequence of changes in the polarity of the environment close to these residues. Figure 3A  
243 shows that the UV-VIS absorption spectrum of HSA does not change in the presence of  
244 increasing concentrations of DHLA, indicating that no significant conformational change of  
245 HSA occurs, thus confirming the results obtained by spectrofluorimetry (Figure 3A). On the  
246 other hand, the absorption spectrum of DHLA shows both blue shift of its peak and the reduction  
247 of its intensity in the presence of HSA (Figure 3B). Similar effect was previously observed upon  
248 DHLA binding to fibrinogen (Gligorijević, Šukalović, Penezić, & Nedić, 2020) and upon  
249 binding of 2-amino-6-hydroxy-4-(4-N,N-dimethylaminophenyl)-pyrimidine-5-carbonitrile to  
250 BSA (Suryawanshi, Walekar, Gore, Anbhule, & Kolekar, 2016). Change in the absorption  
251 spectrum of DHLA is an additional proof that it forms a complex with HSA.

252

253 Protein structure is often affected by ligand binding. Some ligands induce more ordered  
254 structure, others more disordered, and some have no effect. HSA contains only  $\alpha$ -helices as  
255 elements of the secondary structure. It was shown that binding of PCB and amoxicillin to HSA  
256 increase its content of  $\alpha$ -helices (Radibratovic et al., 2016; Yasmeen, Riyazuddeen, & Rabbani,  
257 2017), while binding of plumbagin, safranal and crocin decrease it (Qais, Husain, Khan, Ahmad,  
258 & Hassan, 2020; Salem et al., 2019). The obtained far-UV CD spectra of HSA (Figure 4A) show  
259 a typical signal of the protein where  $\alpha$ -helices are dominant, with characteristic negative wide  
260 peak in the range from 209 to 220 nm. As it can be seen from this figure, no significant change in  
261 the secondary structure of HSA occurs upon binding of DHLA, even when the concentration of  
262 DHLA is ten times larger than HSA. Tertiary structure of HSA is also unaltered due to DHLA  
263 binding since near-UV CD spectra are practically the same in pre presence of all tested DHLA  
264 concentrations (Figure 4B).

#### 265 *Stability of HSA-DHLA complex*

266 Factors that may affect melting point of a protein, besides its structure, include the presence of  
267 bound molecules as well as their structure. When a complex forms, new interactions establish  
268 that may contribute to altered thermal stability of a protein. In the case of HSA, free protein has  
269  $T_m$  of approximately 62 °C, while bound fatty acids increase its thermal stability reaching  $T_m$   
270 from 64 to 72 °C (Lang & Cole, 2015). Certain ligands, such as PCB and embelin, also increase  
271 thermal stability of HSA (Radibratovic et al., 2016; Yeggoni, Rachamalla, & Subramanyam,



272 2016). On the contrary, some drugs, such as amoxicillin, decrease thermal stability of HSA upon  
273 binding (Yasmeen et al., 2017). Commercial HSA used in this study had  $T_m$  of 68 °C. In the  
274 presence of DHLA,  $T_m$  of HSA increases to 70 °C (Figure 4C). Even though DHLA didn't  
275 change the structure of HSA significantly upon binding (Figures 4A and 4B), it seems that new  
276 interactions in this complex additionally thermally stabilized the protein.

277 Increased  $T_m$  of HSA in the presence of DHLA indicates that rigidity in the protein structure  
278 increases, which may affect its susceptibility to proteolytic cleavage. In order to be proteolyzed,  
279 peptide bonds in the protein need to be flexible and exposed enough to enable its accurate  
280 accommodation in the active site of a protease. Some ligands, such as bilirubin, reduce the  
281 susceptibility of HSA to cleavage by trypsin (Sjödin, Hansson, & Sjöholm, 1977). According to  
282 the results of this study, it seems that DHLA, although it thermally stabilizes HSA, has no  
283 significant effect on HSA proteolysis by trypsin (Figure 4D). Thus, it may be expected that the  
284 formation of HSA-DHLA complex will not have significant (if any) effect on the protein half-  
285 life in circulation in respect to proteolysis. The first and the dominant fragment of HSA resulting  
286 from proteolysis by trypsin is the one at about 50 kDa, while other fragments with lower  
287 concentrations and molecular masses appear later. This finding is in accordance with the already  
288 published data (Radibratovic et al., 2016).

### 289 *Molecular modeling*

290 Binding site IIA consists of a binding pocket deeply embedded in the core of the subdomain that  
291 is formed by all six helices of the subdomain and the loop-helix residues 148-154 of IB (Ghuman  
292 et al., 2005). Pocket interior is predominantly hydrophobic, apart from the two clusters of polar  
293 residues (Tyr150, His242, Arg257 and Lys195; Lys199, Arg218 and Arg222).

294 Induced fit docking simulation results have shown that DHLA binds to HSA BS II site (Figure  
295 5). The energetically most favorable conformation of the docked pose has showed that the key  
296 interactions are salt bridges formed by DHLA carboxyl group with Arg18 and Arg222 of HSA,  
297 followed by hydrogen bonds formed between DHLA sulfhydryl group and Arg257, Ser287  
298 (Figure 5). Molecular docking analysis suggested that DHLA binds at Sudlow I site in a defined  
299 conformation, thus favoring interactions with specific amino residues. Having in mind that  
300 DHLA has high torsional flexibility due to nine dihedral angles which give many possible  
301 rotamers (Vigorito, Calabrese, Paltanin, Melandri, & Maris, 2017), a recorded change in the  
302 absorption spectrum (Figure 3B) could point to a DHLA-conformational shift towards rotamers  
303 with the highest probability of being bound to HSA.

304 To verify docking simulation results, DHLA-HSA interactions were monitored throughout 50 ns  
305 molecular dynamic simulation. MD starting point was the best conformation obtained in docking  
306 stage. The obtained MD trajectory was analyzed both in terms of complex stability and the  
307 persistence of key DHLA-HSA interactions over simulation time period.

308 The observed RMSD values for HSA show that simulation has equilibrated, fluctuations fall  
309 within 1 – 2.5 Å range suggesting minor conformational changes during simulation (Figure 6A).

310 Monitored HSA-DHLA interactions showed that key interaction is a salt bridge formed between  
311 DHLA carboxyl group and Arg218. This interaction is present over 93% of simulation time,  
312 making it crucial for DHLA binding to HSA and it also indicates correct orientation of DHLA  
313 inside the BS. Salt bridge with Arg218 is reinforced by interaction with Arg222 (42% of  
314 simulation time). Once DHLA is in correct position in the BS, additional hydrogen bonds  
315 between sulfhydryl group and Ser287, Arg257 are established. Those hydrogen bonds are  
316 maintained for a 10% (Ser287) and 7% (Arg257) of total simulation time (Figure 6B). All other  
317 interactions are observed for less than 5% of total simulation time (Supplementary Figure 1).

318 HSA can be modified by oxidation, and slight structural alterations, resulting from this chemical  
319 modification, cause an impairment of HSA functions, including its ligand binding ability  
320 (Kawakami et al., 2006). Redox state of Cys34 on HSA can also influence its binding properties  
321 (Oetl & Stauber, 2007). Considering its high concentration and the capacity to bind wide range  
322 of drugs, changes in binding properties of HSA may have a significant impact on  
323 pharmacokinetic and pharmacodynamic (PKPD) characteristics of prescribed drugs. DHLA was  
324 shown to be able to protect serum albumin from glycation (Kawabata & Packer, 1994),  
325 methylglyoxal modification (Sadowska-Bartosz, Galiniak, & Bartosz, 2014) and it can protect  
326 Cys34 from oxidation (Atukeren et al., 2010). Thus, by binding to HSA, DHLA can directly  
327 protect HSA from oxidation and, at the same time, keep the binding and antioxidative properties  
328 of HSA unaltered. Since it is used as a food supplement, a detailed PKPD knowledge on DHLA  
329 is very important, including information on its binding partners in the circulation. Besides HSA,  
330 fibrinogen was also shown to bind DHLA with a similar affinity (Gligorijević et al., 2020).

## 331 **CONCLUSION**

332 The obtained results describe in detail the binding of DHLA to HSA for the first time.  
333 Experimental results have shown that binding site IIA or Sudlow I is the preferential binding site  
334 for DHLA. Molecular docking analysis and dynamics confirmed the ability of Sudlow I site to  
335 accommodate DHLA and that the formed complex is stable. The binding of DHLA doesn't alter  
336 significantly the structure of HSA, although it stabilizes the protein itself to some extent. HSA  
337 susceptibility to proteolytic cleavage by trypsin remains the same in the presence of DHLA, thus  
338 no change of HSA half-life in the circulation (regarding proteolysis) is expected. The reported  
339 results expand the knowledge on PKPD properties of DHLA and offer a future perspective for  
340 further investigations regarding the use of DHLA as a dietary intervention. Furthermore, the  
341 obtained results raise concerns whether alpha-lipoic acid and DHLA are sufficiently beneficial as  
342 a part of the proposed treatment protocol of patients with COVID-19 who are receiving warfarin  
343 therapy as well, due to their competitive binding and lower affinity of HSA for these antioxidants  
344 than for warfarin.

345 **Acknowledgments:** This research was funded the Ministry of Education, Science and  
346 Technological Development of the Republic of Serbia, contract numbers: 451-03-68/2020-  
347 14/200019 and 451-03-68/2020-14/200026. There is no conflict of interest regarding this study.

## 348 REFERENCES

- 349 Atukeren, P., Aydin, S., Uslu, E., Gumustas, M. K., & Cakatay, U. (2010). Redox homeostasis of  
350 albumin in relation to alpha-lipoic acid and dihydrolipoic acid. *Oxidative Medicine and*  
351 *Cellular Longevity*, 3(3), 206–213. <https://doi.org/10.4161/oxim.3.3.11786>
- 352 Bowers, K. J., Chow, E., Xu, H., Dror, R. O., Eastwood, M. P., Gregerson, B. A., ... Shaw, D. E.  
353 (2006). Scalable Algorithms for Molecular Dynamics Simulations on Commodity Clusters.  
354 In *SC '06: Proceedings of the 2006 ACM/IEEE Conference on Supercomputing* (pp. 43–  
355 43). Tampa. <https://doi.org/10.1109/SC.2006.54>
- 356 Fasano, M., Curry, S., Terreno, E., Galliano, M., Fanali, G., Narciso, P., ... Ascenzi, P. (2005).  
357 The extraordinary ligand binding properties of human serum albumin. *IUBMB Life*, 57(12),  
358 787–796. <https://doi.org/10.1080/15216540500404093>
- 359 Ghuman, J., Zunszain, P. A., Petitpas, I., Bhattacharya, A. A., Otagiri, M., & Curry, S. (2005).  
360 Structural basis of the drug-binding specificity of human serum albumin. *Journal of*  
361 *Molecular Biology*, 353(1), 38–52. <https://doi.org/10.1016/j.jmb.2005.07.075>
- 362 Gligorijević, N., Šukalović, V., Penezić, A., & Nedić, O. (2020). Characterisation of the binding  
363 of dihydro-alpha-lipoic acid to fibrinogen and the effects on fibrinogen oxidation and fibrin  
364 formation. *International Journal of Biological Macromolecules*, 147, 319–325.  
365 <https://doi.org/10.1016/j.ijbiomac.2020.01.098>
- 366 Horowitz, R. I., & Freeman, P. R. (2020). Three novel prevention , diagnostic , and treatment  
367 options for COVID-19 urgently necessitating controlled randomized trials. *Medical*  
368 *Hypotheses*, 143, 109851. <https://doi.org/10.1016/j.mehy.2020.109851>
- 369 Kawabata, T., & Packer, L. (1994).  $\alpha$ -Lipoate can protect against glycation of serum albumin,  
370 but not low density lipoprotein. *Biochemical and Biophysical Research Communications*.  
371 <https://doi.org/10.1006/bbrc.1994.2154>
- 372 Kawakami, A., Kubota, K., Yamada, N., Tagami, U., Takehana, K., Sonaka, I., ... Hirayama, K.  
373 (2006). Identification and characterization of oxidized human serum albumin: A slight  
374 structural change impairs its ligand-binding and antioxidant functions. *FEBS Journal*,  
375 273(14), 3346–3357. <https://doi.org/10.1111/j.1742-4658.2006.05341.x>
- 376 Lang, B. E., & Cole, K. D. (2015). Unfolding properties of recombinant human serum albumin  
377 products are due to bioprocessing steps. *Biotechnology Progress*, 31(1), 62–69.  
378 <https://doi.org/10.1002/btpr.1996>
- 379 Lee, P., & Wu, X. (2015). Review: Modifications of Human Serum Albumin and Their Binding  
380 Effect. *Current Pharmaceutical Design*, 21(14), 1862–1865.  
381 <https://doi.org/10.2174/1381612821666150302115025>

- 382 Li, Q., Yang, W., Qu, L., Qi, H.-Y., Huang, Y., & Zhang, Z. (2014). Interaction of Warfarin with  
383 Human Serum Albumin and Effect of Ferulic Acid on the Binding. *Journal of*  
384 *Spectroscopy*, 2014, Artical ID 834501. <https://doi.org/10.1155/2014/834501>
- 385 Liang, L., Tajmir-Riahi, H. A., & Subirade, M. (2008). Interaction of  $\beta$ -Lactoglobulin with  
386 resveratrol and its biological implications. *Biomacromolecules*, 9(1), 50–56.  
387 <https://doi.org/10.1021/bm700728k>
- 388 McLachlan, A. D., & Walker, J. E. (1977). Evolution of serum albumin. *Journal of Molecular*  
389 *Biology*, 112(4), 543–558. [https://doi.org/10.1016/S0022-2836\(77\)80163-0](https://doi.org/10.1016/S0022-2836(77)80163-0)
- 390 Minic, S. L., Milcic, M., Stanic-Vucinic, D., Radibratovic, M., Sotiroudis, T. G., Nikolic, M. R.,  
391 & Velickovic, T. C. (2015). Phycocyanobilin, a bioactive tetrapyrrolic compound of blue-  
392 green alga Spirulina, binds with high affinity and competes with bilirubin for binding on  
393 human serum albumin. *RSC Advances*, 5(76), 61787–61798.  
394 <https://doi.org/10.1039/c5ra05534b>
- 395 Oettl, K., & Stauber, R. E. (2007). Physiological and pathological changes in the redox state of  
396 human serum albumin critically influence its binding properties. *British Journal of*  
397 *Pharmacology*, 151(5), 580–590. <https://doi.org/10.1038/sj.bjp.0707251>
- 398 Pavićević, I. D., Jovanović, V. B., Takić, M. M., Penezić, A. Z., Aćimović, J. M., & Mandić, L.  
399 M. (2014). Fatty acids binding to human serum albumin: Changes of reactivity and  
400 glycation level of Cysteine-34 free thiol group with methylglyoxal. *Chemico-Biological*  
401 *Interactions*, 224, 42–50. <https://doi.org/10.1016/j.cbi.2014.10.008>
- 402 Perricone, N., Nagy, K., Horváth, F., Dajkó, G., Uray, I., & Zs.-Nagy, I. (1999). Alpha lipoic  
403 acid (ALA) protects proteins against the hydroxyl free radical-induced alterations: Rationale  
404 for its geriatric topical application. *Archives of Gerontology and Geriatrics*, 29(1), 45–56.  
405 [https://doi.org/10.1016/S0167-4943\(99\)00022-9](https://doi.org/10.1016/S0167-4943(99)00022-9)
- 406 Petitpas, I., Bhattacharya, A. A., Twine, S., East, M., & Curry, S. (2001). Crystal structure  
407 analysis of warfarin binding to human serum albumin. Anatomy of drug site I. *Journal of*  
408 *Biological Chemistry*, 276(25), 22804–22809. <https://doi.org/10.1074/jbc.M100575200>
- 409 Qais, F. A., Husain, F. M., Khan, R. A., Ahmad, I., & Hassan, I. (2020). Deciphering the  
410 interaction of plumbagin with human serum albumin: A combined biophysical and  
411 molecular docking study. *Journal of King Saud University - Science*, 32(6), 2854–2862.  
412 <https://doi.org/10.1016/j.jksus.2020.07.008>
- 413 Radibratovic, M., Minic, S., Stanic-Vucinic, D., Nikolic, M., Milcic, M., & Velickovic, T. C.  
414 (2016). Stabilization of human serum albumin by the binding of phycocyanobilin, a  
415 bioactive chromophore of blue-green alga spirulina: Molecular dynamics and experimental  
416 study. *PLoS ONE*, 11(12), e0167973. <https://doi.org/10.1371/journal.pone.0167973>
- 417 Sadowska-Bartosz, I., Galiniak, S., & Bartosz, G. (2014). Kinetics of glycooxidation of bovine  
418 serum albumin by methylglyoxal and glyoxal and its prevention by various compounds.  
419 *Molecules*, 19(4), 4880–4896. <https://doi.org/10.3390/molecules19044880>

- 420 Salem, A. A., Lotfy, M., Amin, A., & Ghattas, M. A. (2019). Characterization of human serum  
421 albumin's interactions with safranal and crocin using multi-spectroscopic and molecular  
422 docking techniques. *Biochemistry and Biophysics Reports*, 20(September), 100670.  
423 <https://doi.org/10.1016/j.bbrep.2019.100670>
- 424 Salinthon, S., Yadav, V., Bourdette, D., & Carr, D. (2008). Lipoic Acid: A Novel Therapeutic  
425 Approach for Multiple Sclerosis and Other Chronic Inflammatory Diseases of the CNS.  
426 *Endocrine, Metabolic & Immune Disorders-Drug Targets*, 8(2), 132–142.  
427 <https://doi.org/10.2174/187153008784534303>
- 428 Sherman, W., Day, T., Jacobson, M. P., Friesner, R. A., & Farid, R. (2006). Novel procedure for  
429 modeling ligand/receptor induced fit effects. *Journal of Medicinal Chemistry*, 49(2), 534–  
430 553. <https://doi.org/10.1021/jm050540c>
- 431 Sjödin, T., Hansson, R., & Sjöholm, I. (1977). Isolation and identification of a trypsin-resistant  
432 fragment of human serum albumin with bilirubin- and drug- binding properties\*.  
433 *Biochimica et Biophysica Acta*, 494, 61–75. [https://doi.org/10.1016/0005-2795\(77\)90135-0](https://doi.org/10.1016/0005-2795(77)90135-0)
- 434 Smith, A. R., Shenvi, S. V., Widlansky, M., Suh, J. H., & Hagen, T. M. (2004). Lipoic Acid as a  
435 Potential Therapy for Chronic Diseases Associated with Oxidative Stress. *Current*  
436 *Medicinal Chemistry*, 11(9), 1135–1146. <https://doi.org/10.2174/0929867043365387>
- 437 Suji, G., Khedkar, S. A., Singh, S. K., Kishore, N., Coutinho, E. C., Bhor, V. M., & Sivakami, S.  
438 (2008). Binding of lipoic acid induces conformational change and appearance of a new  
439 binding site in methylglyoxal modified serum albumin. *Protein Journal*, 27(4), 205–214.  
440 <https://doi.org/10.1007/s10930-008-9126-3>
- 441 Suryawanshi, V. D., Walekar, L. S., Gore, A. H., Anbhule, P. V., & Kolekar, G. B. (2016).  
442 Spectroscopic analysis on the binding interaction of biologically active pyrimidine  
443 derivative with bovine serum albumin. *Journal of Pharmaceutical Analysis*, 6(1), 56–63.  
444 <https://doi.org/10.1016/j.jpba.2015.07.001>
- 445 Van De Weert, M., & Stella, L. (2011). Fluorescence quenching and ligand binding: A critical  
446 discussion of a popular methodology. *Journal of Molecular Structure*, 998(1–3), 144–150.  
447 <https://doi.org/10.1016/j.molstruc.2011.05.023>
- 448 Vasquez, J. M., Vu, A., Schultz, J. S., & Vullev, V. I. (2009). Fluorescence enhancement of  
449 warfarin induced by interaction with  $\beta$ -cyclodextrin. *Biotechnology Progress*, 25(4), 906–  
450 914. <https://doi.org/10.1002/btpr.188>
- 451 Vigorito, A., Calabrese, C., Paltanin, E., Melandri, S., & Maris, A. (2017). Regarding the  
452 torsional flexibility of the dihydrolipoic acid's pharmacophore: 1,3-Propanedithiol. *Physical*  
453 *Chemistry Chemical Physics*, 19(1), 496–502. <https://doi.org/10.1039/c6cp05606g>
- 454 Wang, R. E., Tian, L., & Chang, Y.-H. (2012). A Homogeneous Fluorescent Sensor for Human  
455 Serum Albumin. *Journal of Pharmaceutical and Biomedical Analysis*, 63, 165–169.  
456 <https://doi.org/10.1016/j.jpba.2011.12.035>

- 457 Yasmeen, S., Riyazuddeen, & Rabbani, G. (2017). Calorimetric and spectroscopic binding  
458 studies of amoxicillin with human serum albumin. *Journal of Thermal Analysis and*  
459 *Calorimetry*, 127(2), 1445–1455. <https://doi.org/10.1007/s10973-016-5555-y>
- 460 Yeggoni, D. P., Rachamalla, A., & Subramanyam, R. (2016). Protein stability, conformational  
461 change and binding mechanism of human serum albumin upon binding of embelin and its  
462 role in disease control. *Journal of Photochemistry and Photobiology B: Biology*, 160, 248–  
463 259. <https://doi.org/10.1016/j.jphotobiol.2016.04.012>
- 464 Zhang, L., & Liu, Y. (2020). Potential interventions for novel coronavirus in China: A systematic  
465 review. *Journal of Medical Virology*, 92(5), 479–490. <https://doi.org/10.1002/jmv.25707>
- 466 Zuliani, C., & Baroni, L. (2015). Antioxidants for the Prevention and Treatment of Multiple  
467 Sclerosis: An Overview. In R. R. Watson & V. R. Preedy (Eds.), *Bioactive Nutraceuticals*  
468 *and Dietary Supplements in Neurological and Brain Disease: Prevention and Therapy*  
469 (First, pp. 341–353). Elsevier Inc. <https://doi.org/10.1016/B978-0-12-411462-3.00035-7>

470

## 471 **FIGURE LEGENDS**

472 **Figure 1.** Binding analysis of HSA and DHLA using spectrofluorimetry. Fluorescence emission  
473 spectra of HSA (excited at 280 nm) in the presence of increasing concentrations of DHLA (A).  
474 Stern-Volmer plot (B) and plot used for the determination of the binding constant between HSA  
475 and DHLA (C) obtained using fluorescence emission maximum of HSA at 338 nm. Van't Hoff's  
476 graph obtained by calculating the binding constant between HSA and DHLA at three different  
477 temperatures (D).

478 **Figure 2.** Determination of a binding site of DHLA on HSA. Synchronous fluorescence spectra  
479 of HSA with  $\Delta\lambda = 60$  nm for Trp (A) and  $\Delta\lambda = 15$  nm for Tyr (B) in the presence of increasing  
480 concentrations of DHLA. Fluorescence emission spectra of warfarin (excited at 280 nm) in the  
481 absence and in the presence of HSA, as well as in the presence of HSA and DHLA at  
482 warfarin/DHLA molar ratios of 2/1 and 1/1 (C).

483 **Figure 3.** Analysis of structural alterations of HSA and DHLA due to mutual binding. Far-UV  
484 CD (A) and near-UV CD (B) spectra of HSA alone and in the presence of increasing  
485 concentrations of DHLA. UV absorption spectra of HSA alone and in the presence of increasing  
486 concentrations of DHLA (C). UV-VIS absorption spectra of DHLA alone and in the presence of  
487 HSA (D).

488 **Figure 4.** Analysis of temperature stability of HSA alone and in the presence of DHLA (A).  
489 Analysis of HSA digestion by trypsin in the absence (lanes 1-5, samples taken after 1, 5, 10, 20  
490 and 30 min of proteolysis) and in the presence of DHLA (lanes 6-10) by reducing SDS-PAGE on  
491 12 % gel (B).

492 **Figure 5.** An overview of HSA with DHLA docked into BS II . Domains are color coded and  
493 represented as secondary structure ribbons. BS II composition and key interactions diagram . All  
494 amino acid residues in close contact with DHLA are displayed, with key amino acid residues  
495 marked.

496 **Figure 6.** HSA and DHLA RMSD plot (A) and the observed key interactions during 50 ns  
497 simulation time (B).

498 **Supplementary Figure 1.** Summary of DHLA-HSA interactions observed during 50 ns  
499 simulation time. Each orange line represents one established interaction during 1 ns time frame.

500

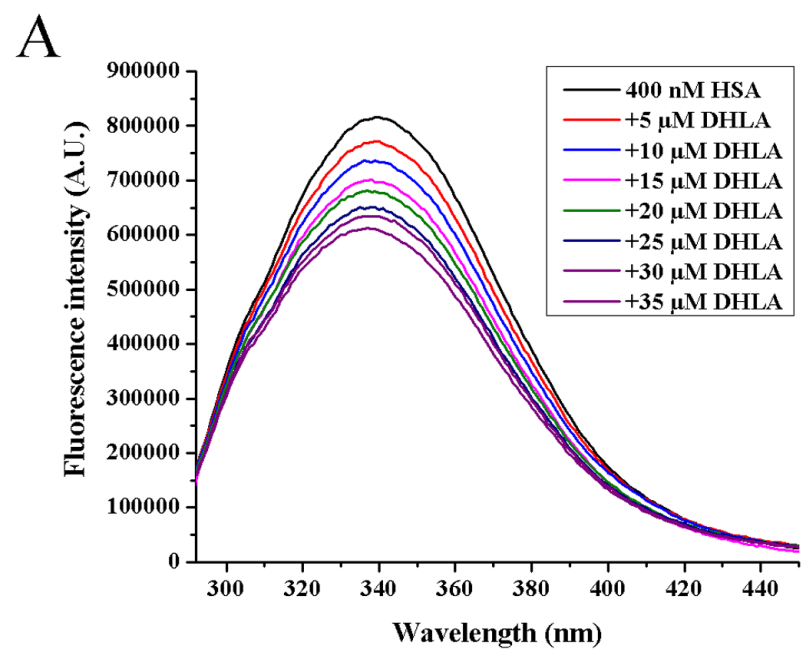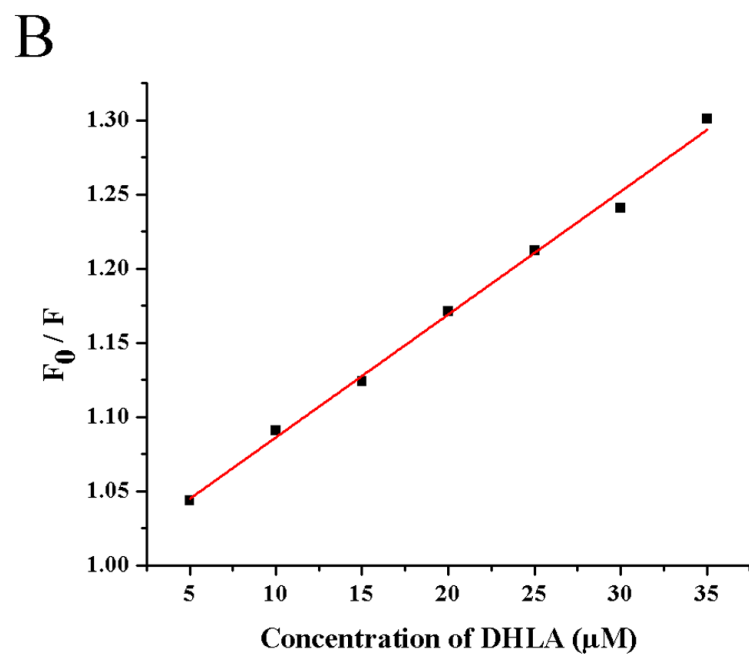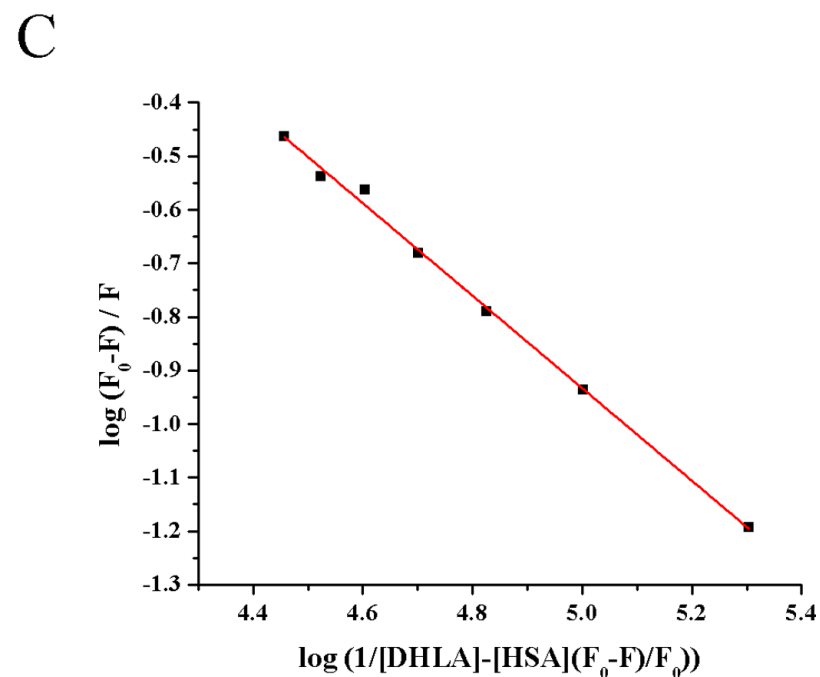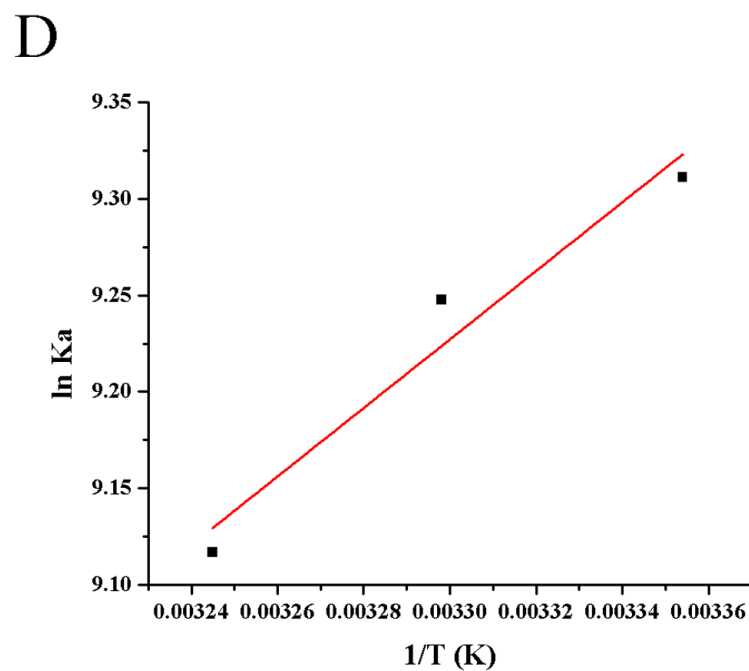



A

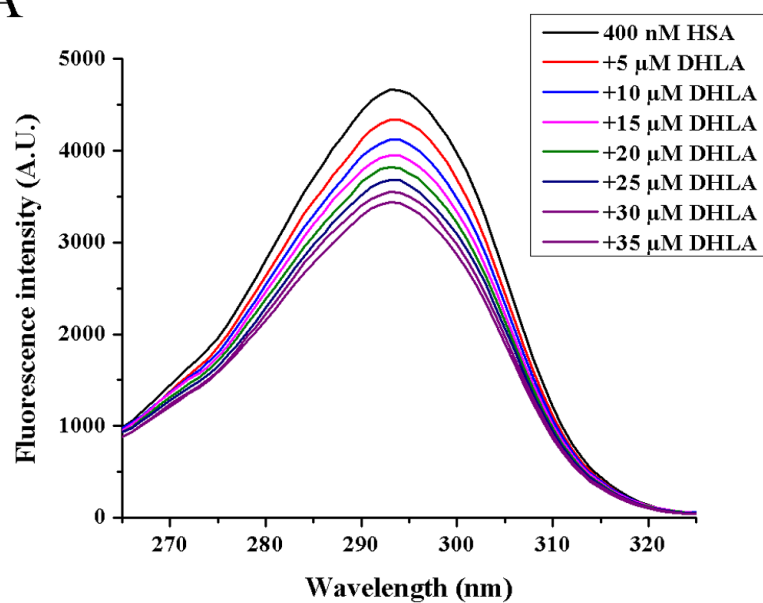

B

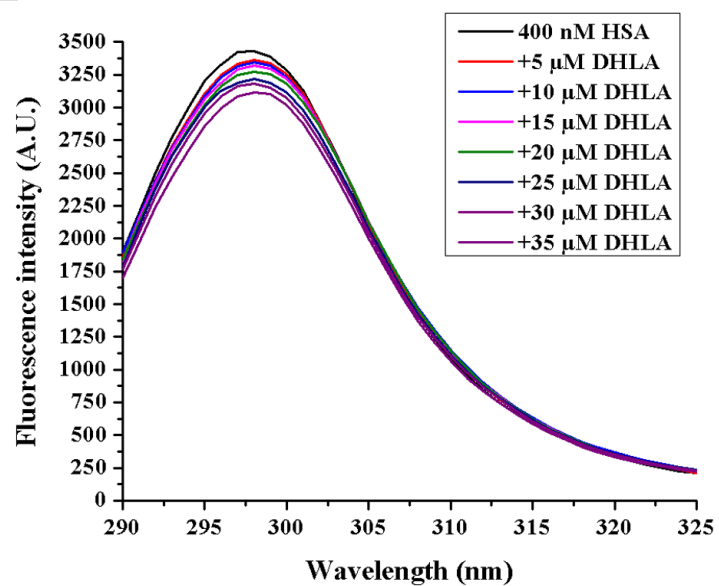

C

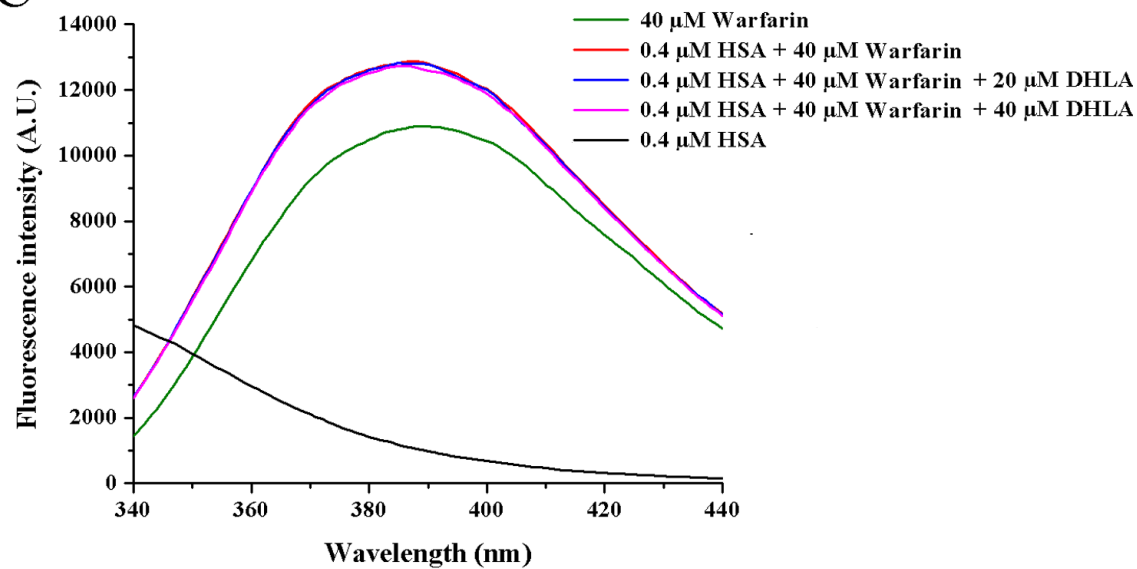

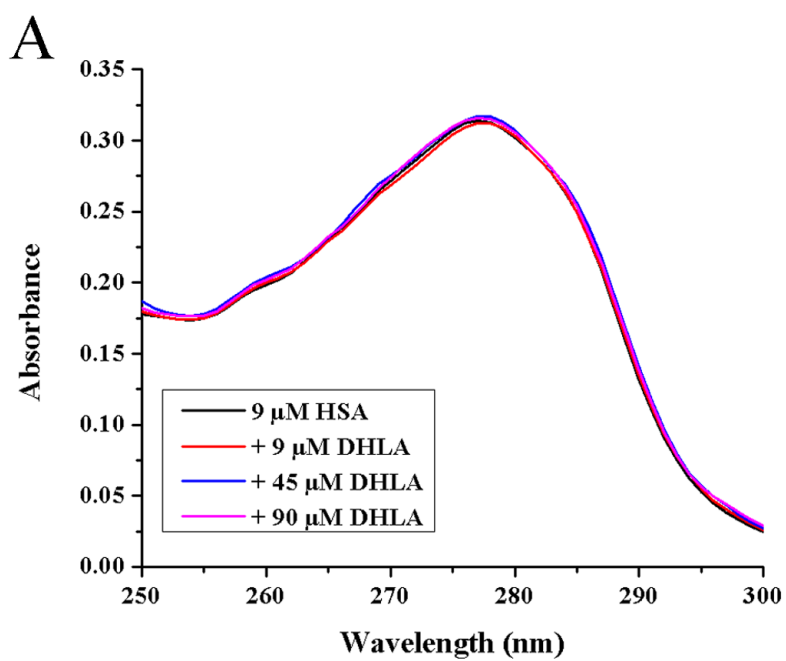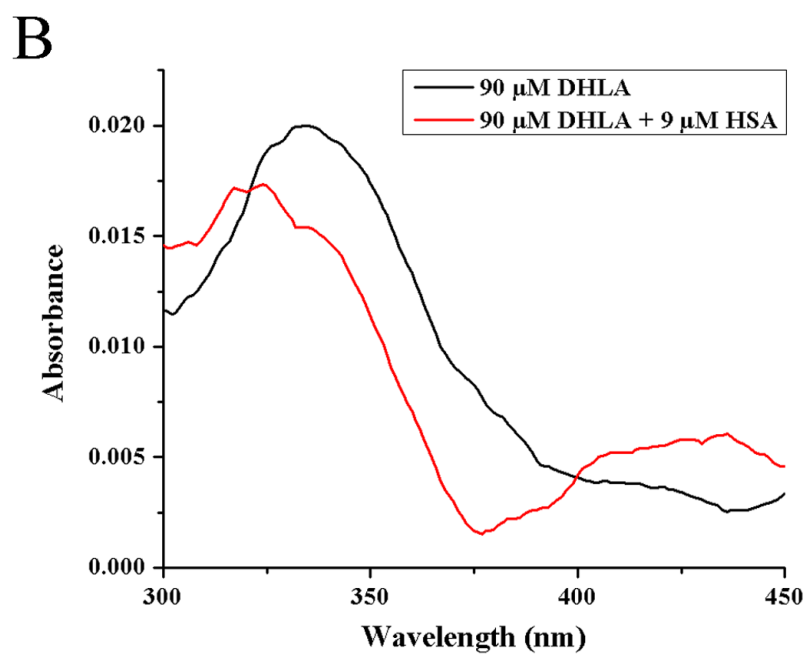

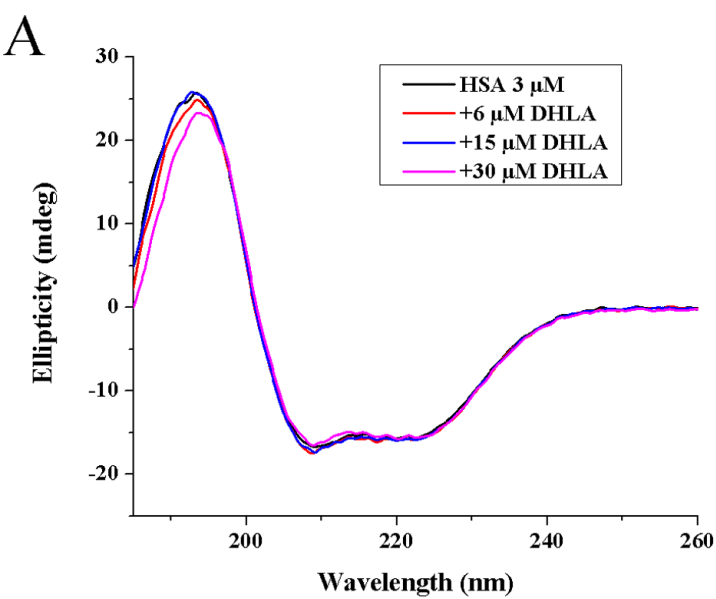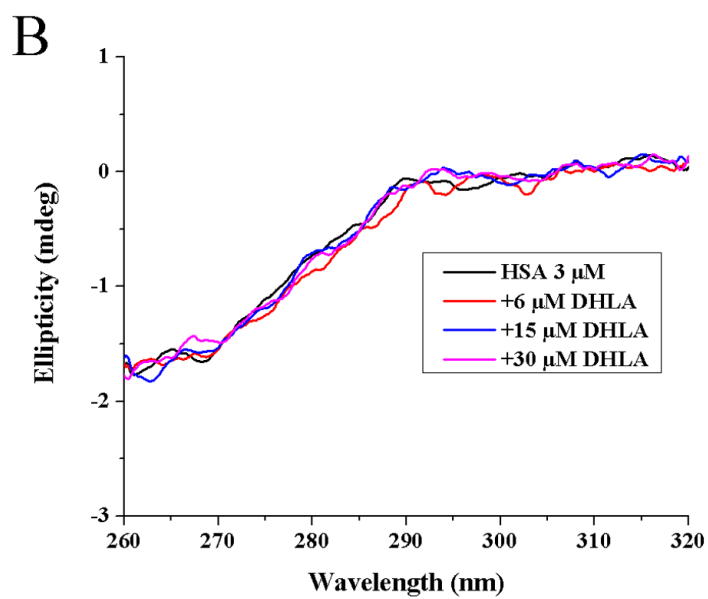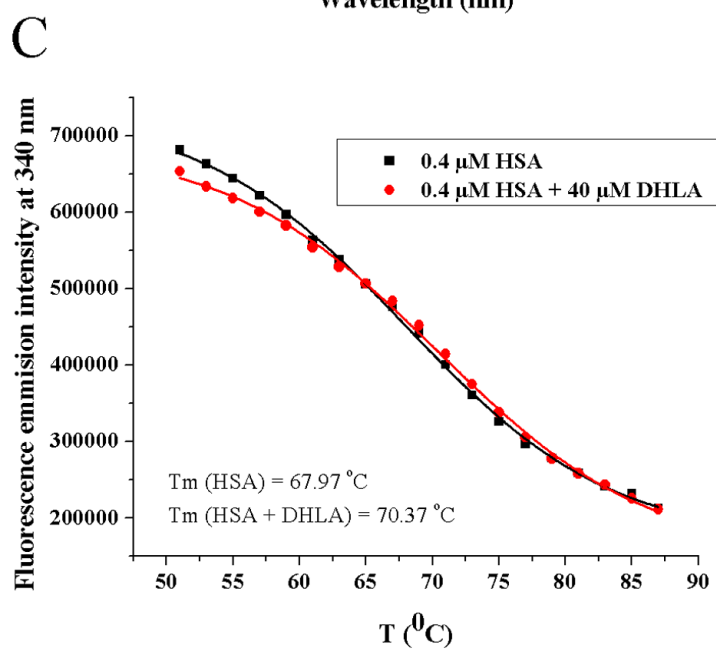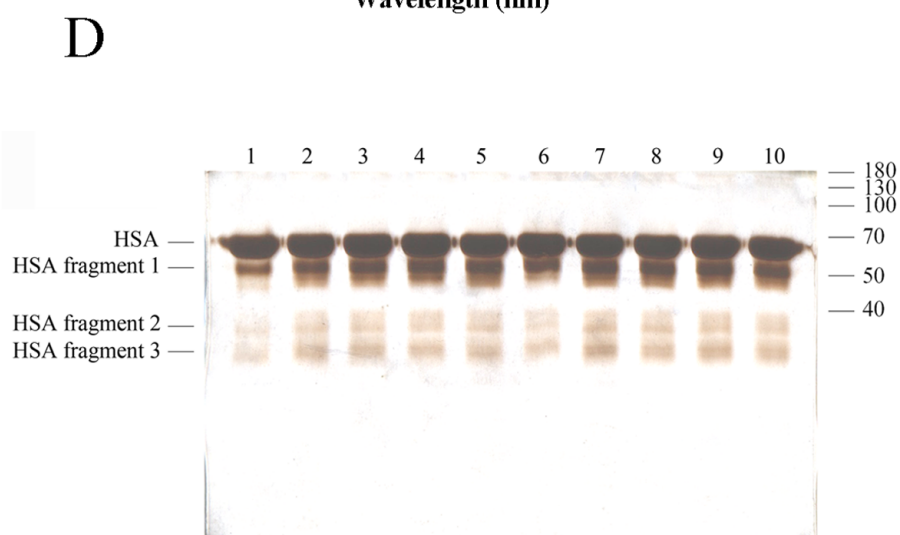

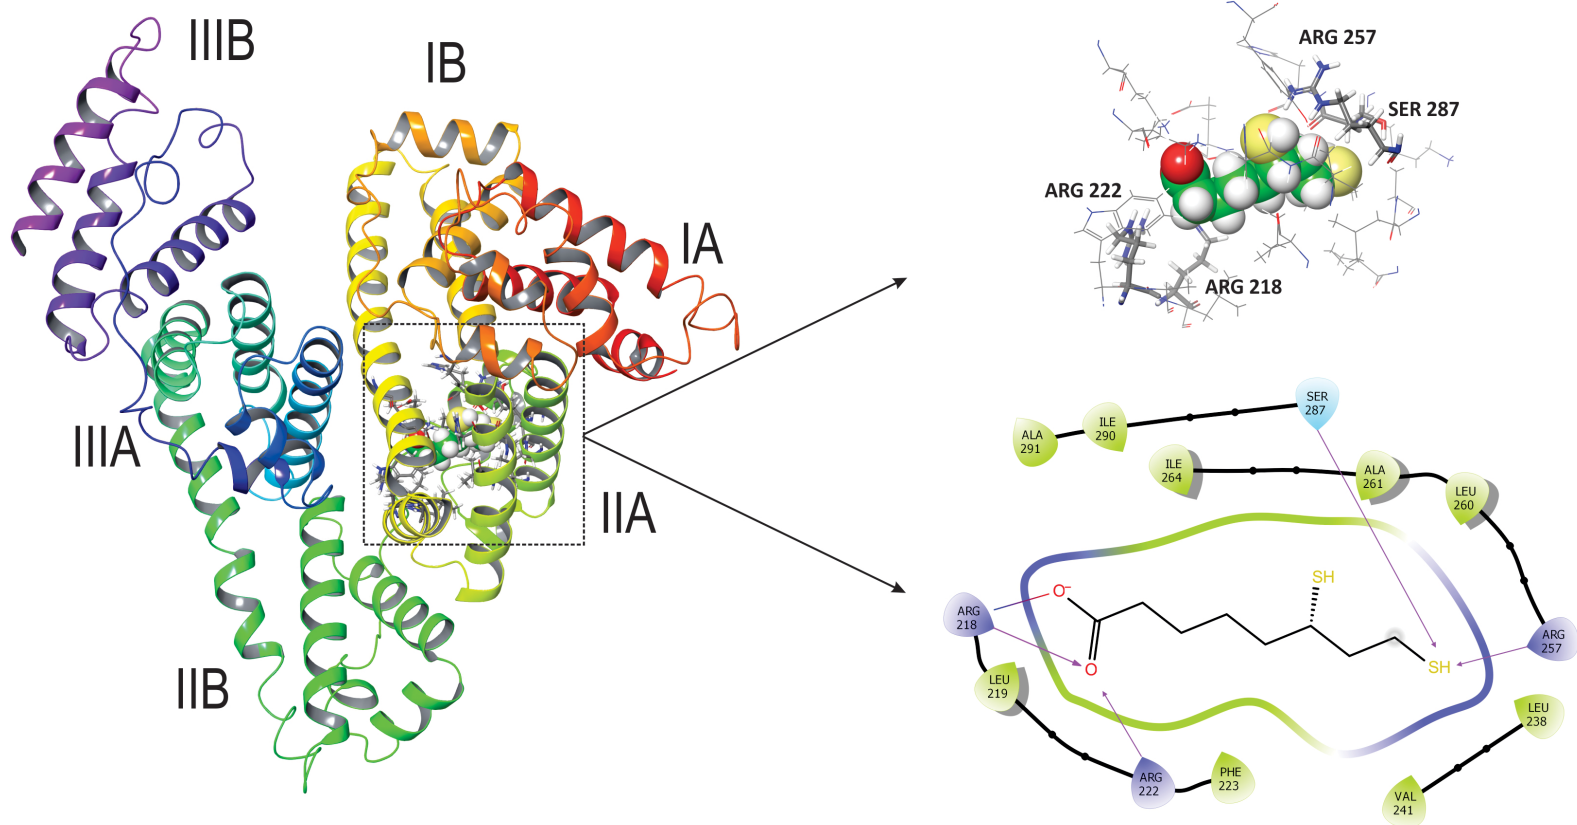

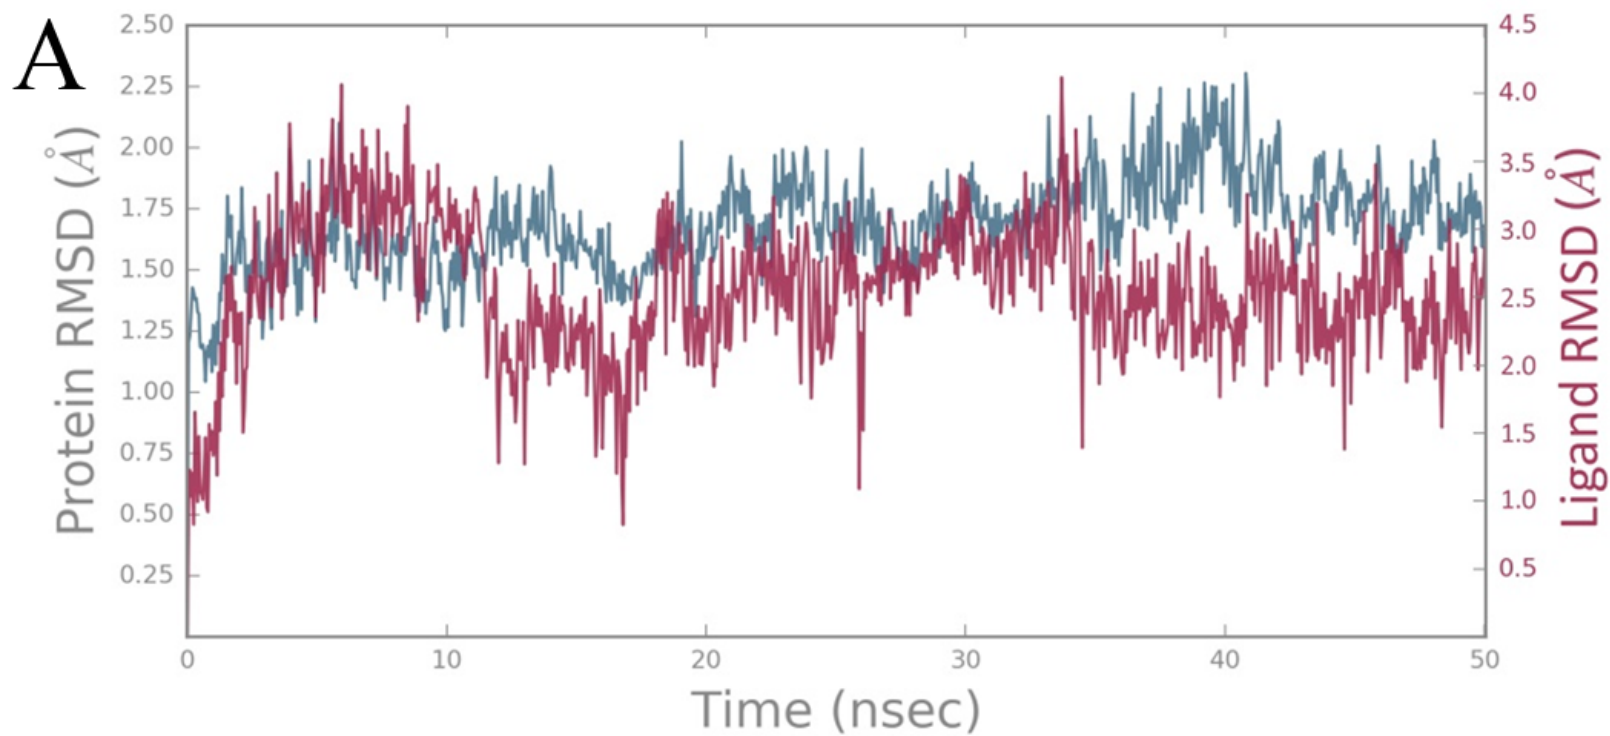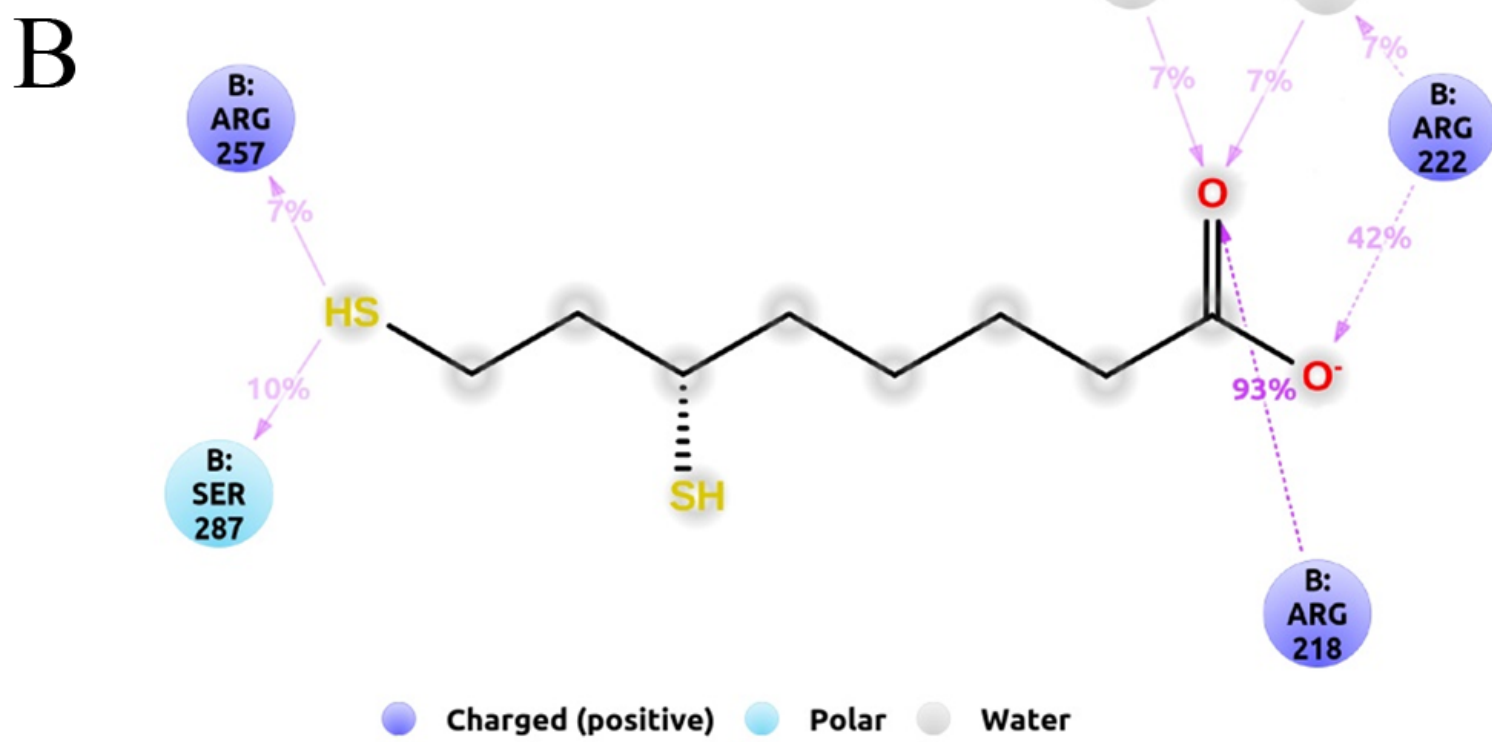

Source: https://www.biorxiv.org/content/10.1101/2020.10.16.342121v1.full.pdf
